# Supplementary material
Source: Springer Nature journal article supplement (https://www.springermedizin.de/resource/supplementary/12961_2014_326_MOESM2_ESM.pdf/9571062)

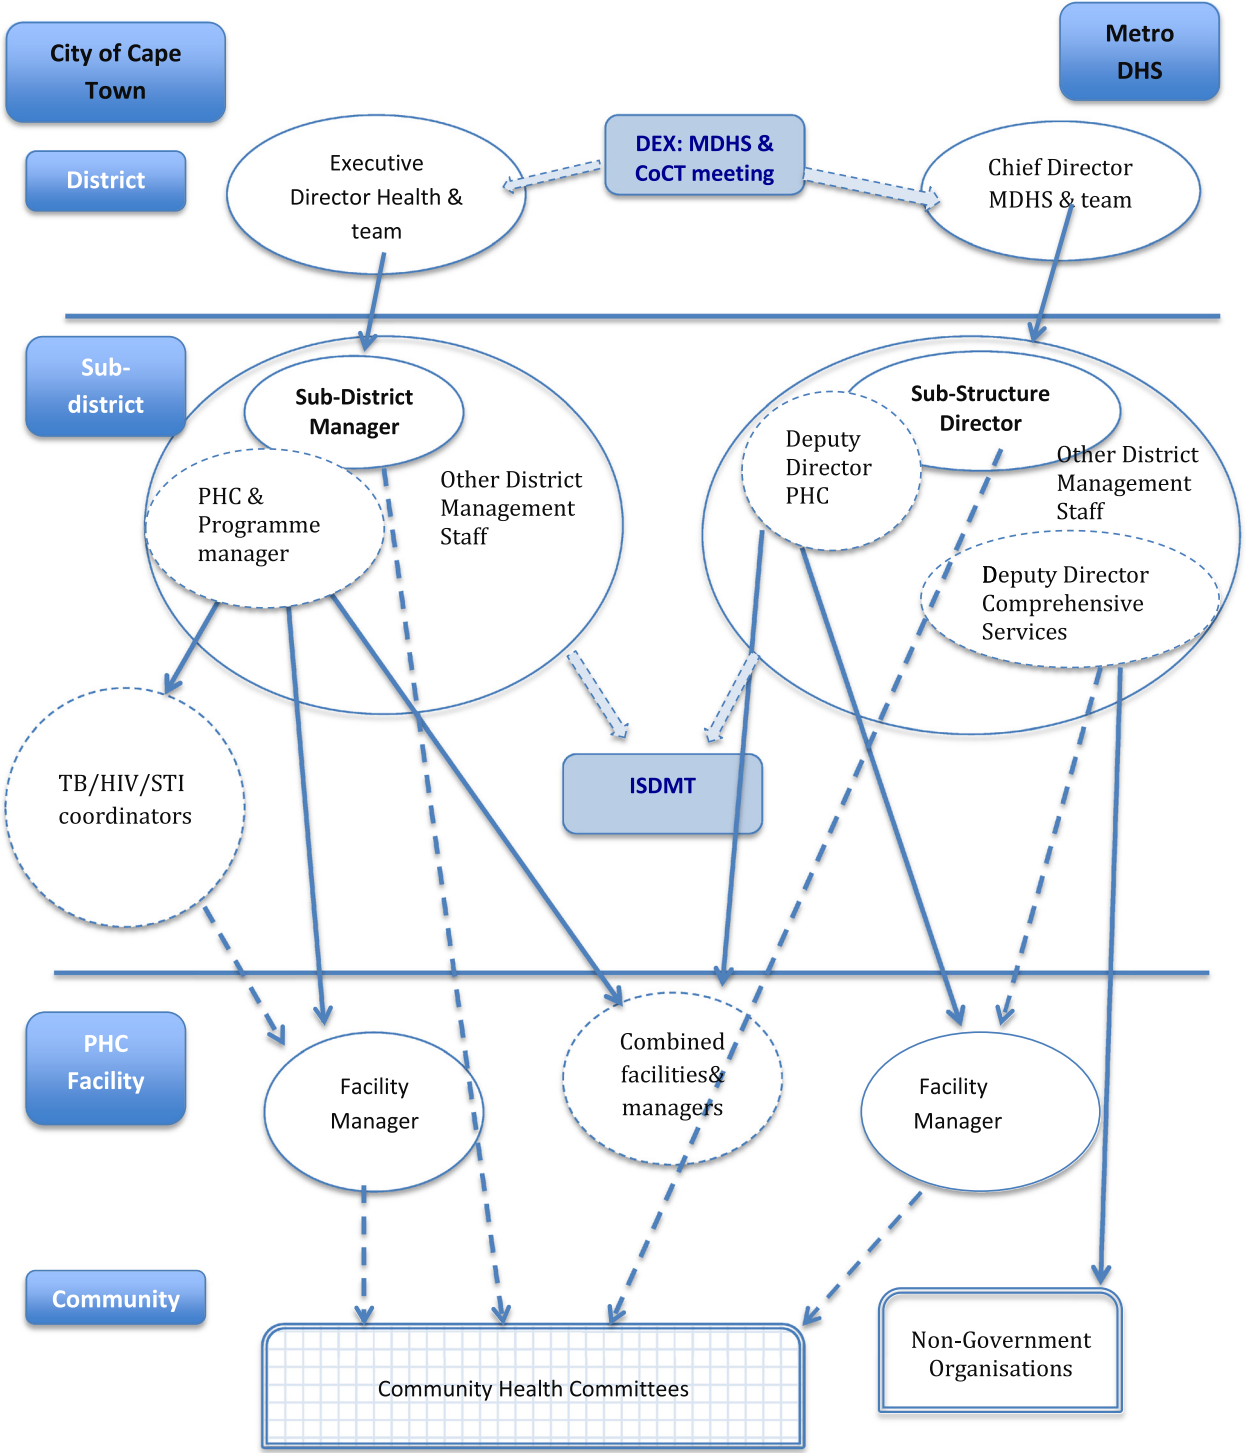

**Glossary:**

- Line management function
- Support function
- Collaboration

Supplement: MOESM2 [file 9571062]
